# Supplementary material
Source: Elsevier journal article supplement (https://www.sciencedirect.com/science/article/pii/S0121812320300669)
Supplement: mmc1 [file S0121812320300669:mmc1.docx]

Descartar patología maligna subyacente

**Si**

OAH familiar

No

OAH secundaria

OAH

Según sospecha clínica

- Ictericia, factores riesgo hepatits, dolor hipocondrio derecho 🡪 analítica con función hepática + serologías + valoración por Digestivo
- Dolor abdominal, diarrea: sospechar enfermedad inflamatoria intestinal o celiaquía 🡪 valoración por Digestivo
- Factores de riesgo para VIH 🡪 serologías
- Exoftalmo, mixedema pretibial 🡪 analítica con función tiroidea + valoración por Endocrinología
- Fiebre, resfriado, sudor nocturno 🡪 analítica, radiografía tórax, prueba tuberculina
- Parestesias, debilidad, edema, hepatoesplenomegalia y alteraciones cutáneas 🡪 valoración por Hematología (descartar Síndrome POEMS)

Acropaquias

Idiopático

¿Historia familiar?

Sospecha OAH

- Radiografía tórax + Neumología
- Marcadores tumorales

Aisladas

- Historia Clínica
- Exploración física

Unilateral

Bilateral

Valoración por Cirugía Vascular

- Hemiplegia
- Lesión vascular: fístula arterio-venosa, aneurismas…

Figura 1. Guía actuación ante acropaquias

**Material suplementario 2**


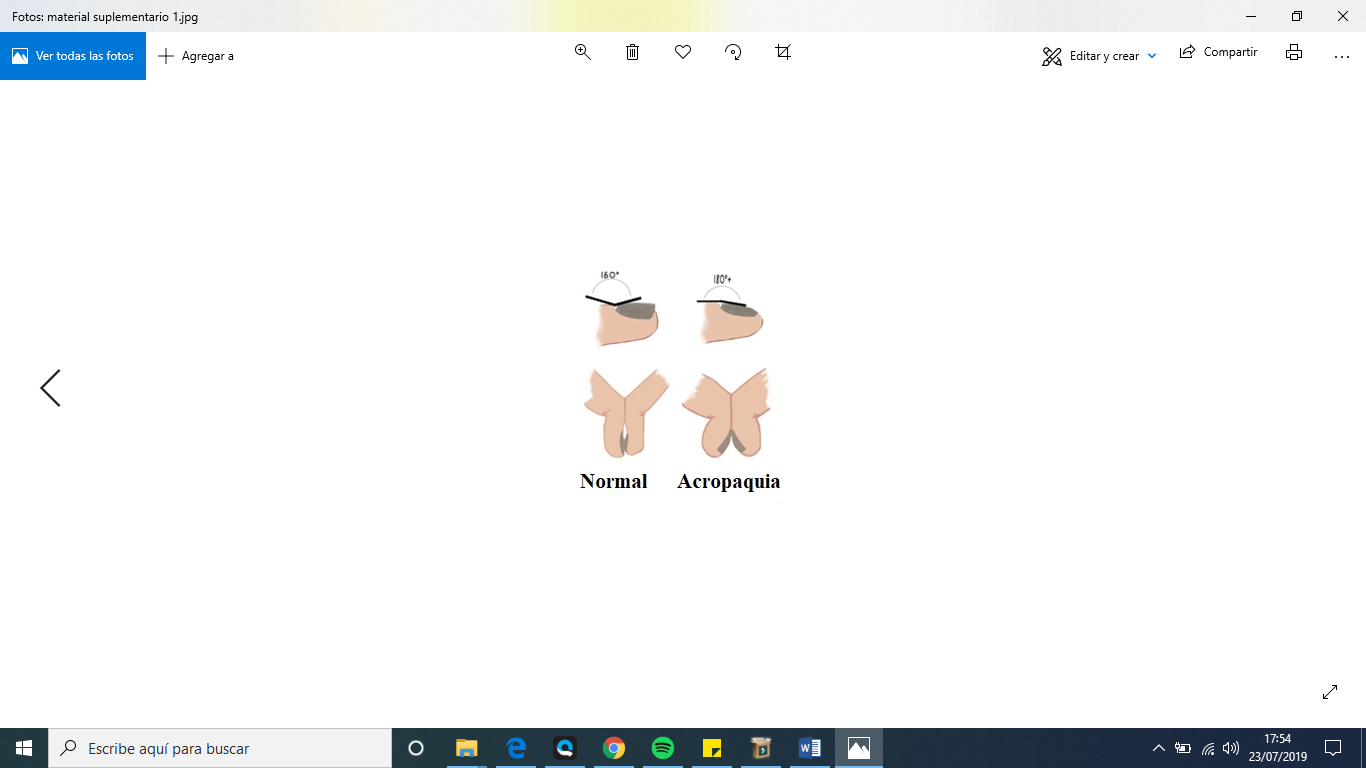


Figura 2. Imagen superior: singo de Lovibond, ángulo que se crea entre la piel proximal a la cutícula y distal, que es patológico cuando es > 180º. Imagen inferior: signo de Schamroth, que es la pérdida de la ventana formada entre el lecho ungueal de dos dedos contrapuestos
